# Supplementary material for: Unveiling a high capacity multi-redox (Nb5+/Nb4+/Nb3+) NASICON-Nb2(PO4)3 anode for Li- and Na-ion batteries
Source: Royal Society of Chemistry journal article supplement (doi:10.1039/d2ta05971a), 2023-01-01
Supplement: d2ta05971a1.pdf [file d2ta05971a1.pdf]

## *Supplementary Information*

### **Unveiling a High Capacity Multi-redox ( $\text{Nb}^{5+}/\text{Nb}^{4+}/\text{Nb}^{3+}$ ) NASICON- $\text{Nb}_2(\text{PO}_4)_3$ Anode for Li- and Na-ion Batteries**

*Biplab Patra,<sup>1</sup> Keshav Kumar,<sup>1</sup> Debolina Deb,<sup>2</sup> Subham Ghosh,<sup>1</sup> Gopalakrishnan Sai Gautam,<sup>2</sup> and Premkumar Senguttuvan<sup>1\*</sup>*

<sup>1</sup>New Chemistry Unit, International Centre for Materials Science and School of Advanced Materials, Jawaharlal Nehru Centre for Advanced Scientific Research, Jakkur, Bengaluru-560064, India.

<sup>2</sup>Department of Materials Engineering, Indian Institute of Science, Bengaluru-560012, India.

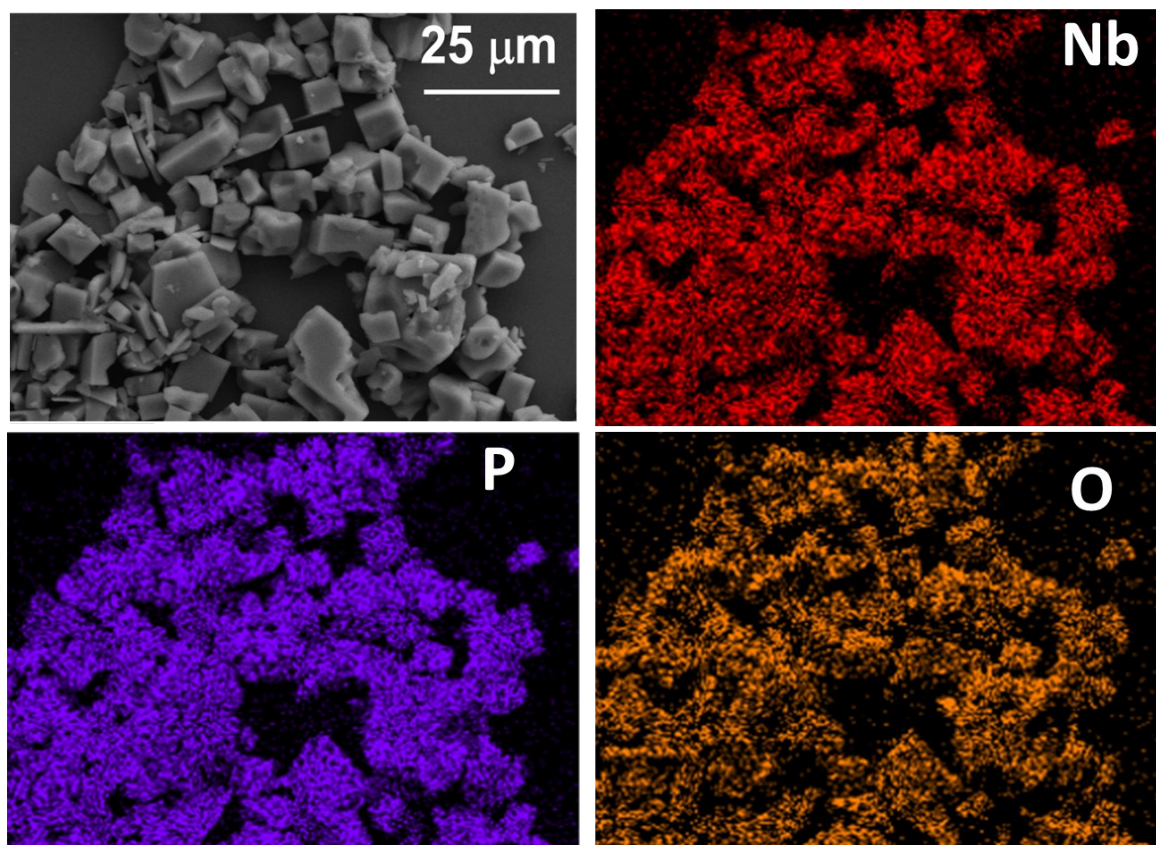

**Figure S1.** FESEM images and EDS mapping of  $\text{Nb}_2(\text{PO}_4)_3$  anode.

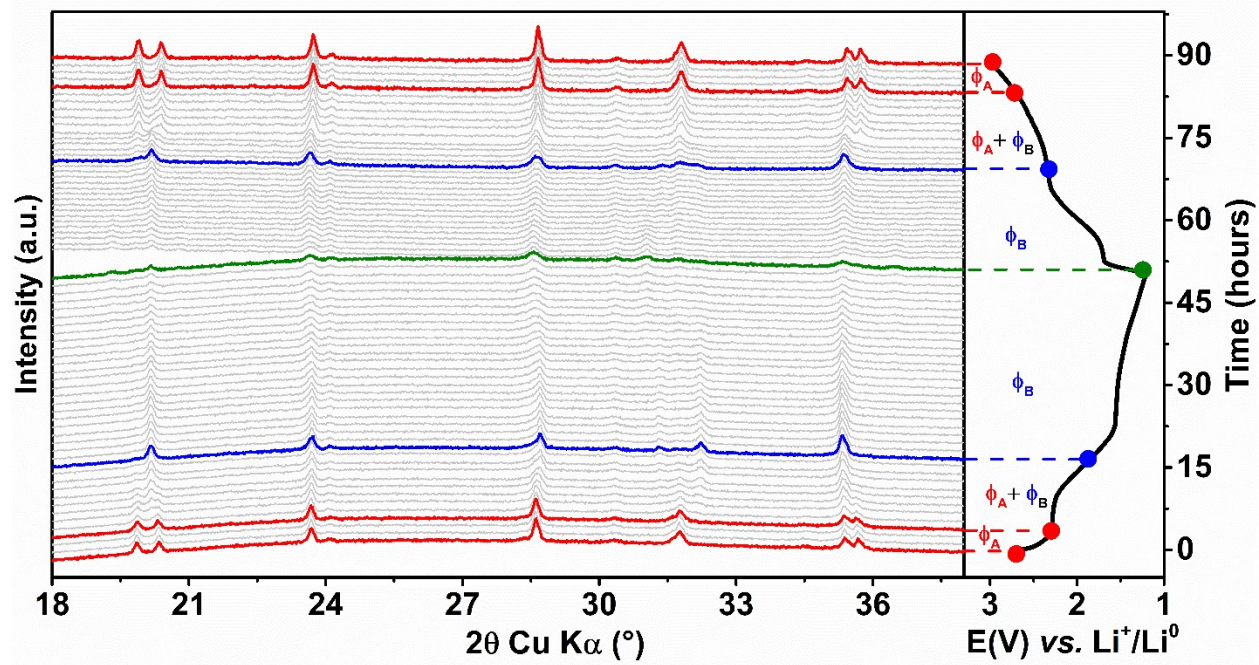

Figure S2. *In-situ* XRD patterns of  $\text{Nb}_2(\text{PO}_4)_3/\text{Li}$  cell collected during 2<sup>nd</sup> cycle.

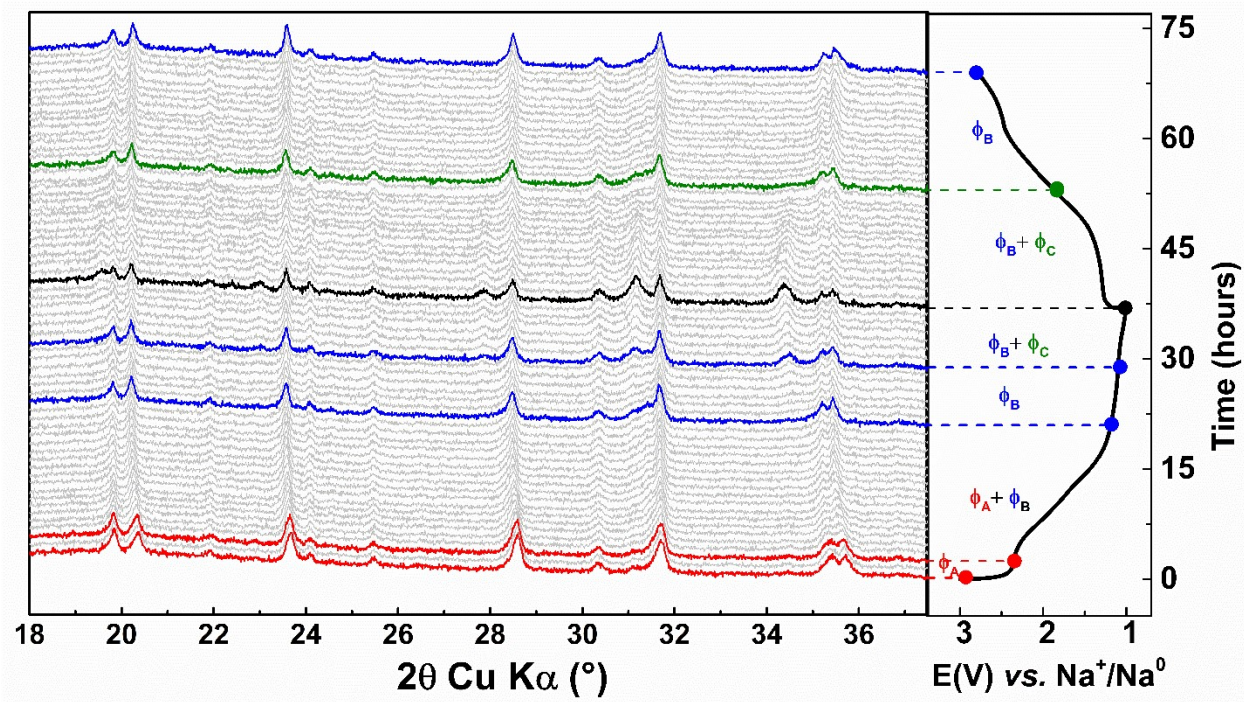

**Figure S3.** *In-situ* XRD patterns of  $\text{Nb}_2(\text{PO}_4)_3/\text{Na}$  cell collected during 2<sup>nd</sup> cycle.

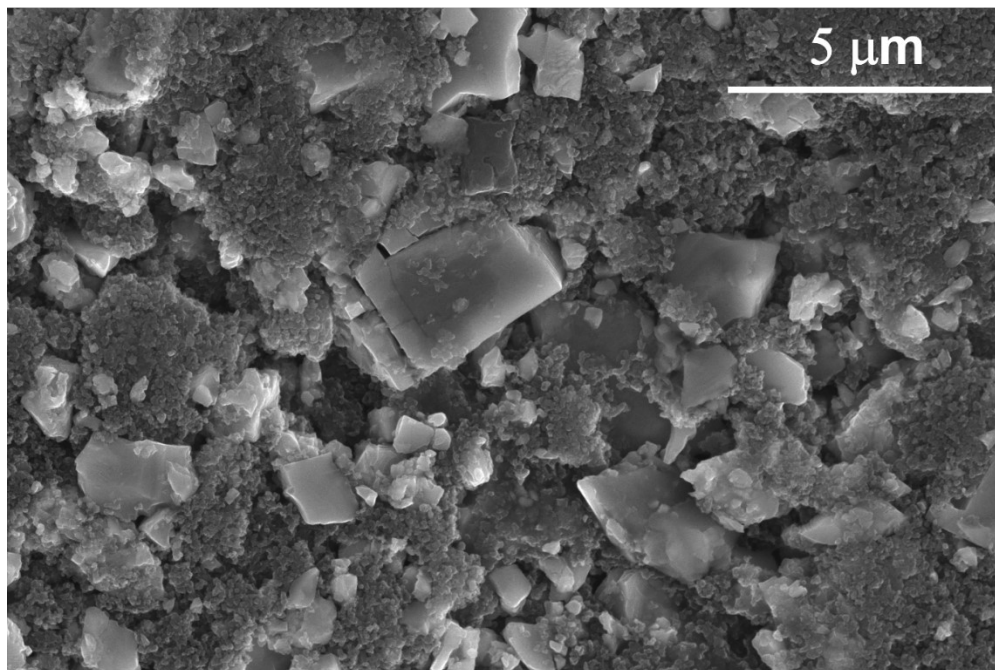

**Figure S4.** SEM images of as-prepared Nb<sub>2</sub>(PO<sub>4</sub>)<sub>3</sub> electrode.

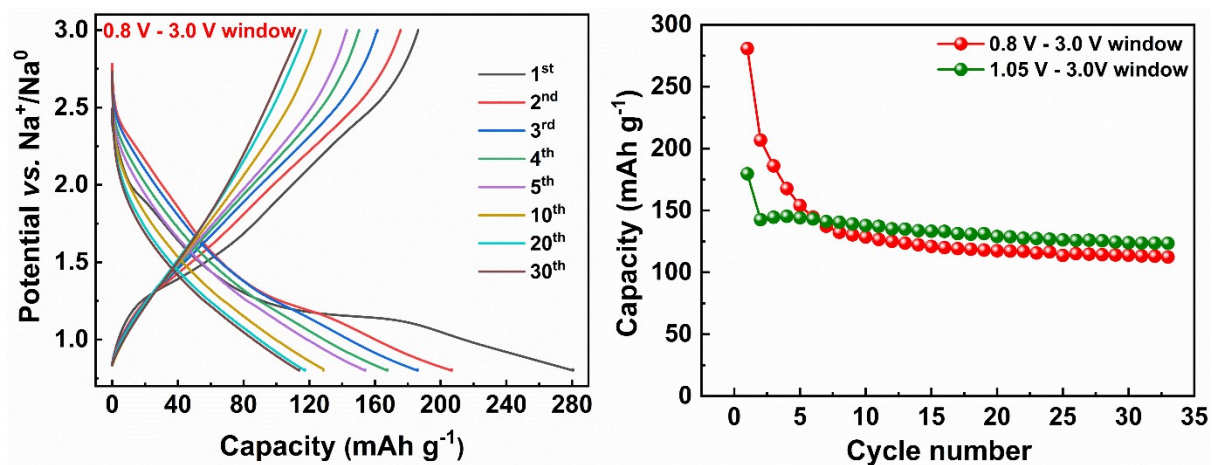

**Figure S5.** Comparison of cycling performances of Nb<sub>2</sub>(PO<sub>4</sub>)<sub>3</sub>/Na cells with different cut-off voltages.

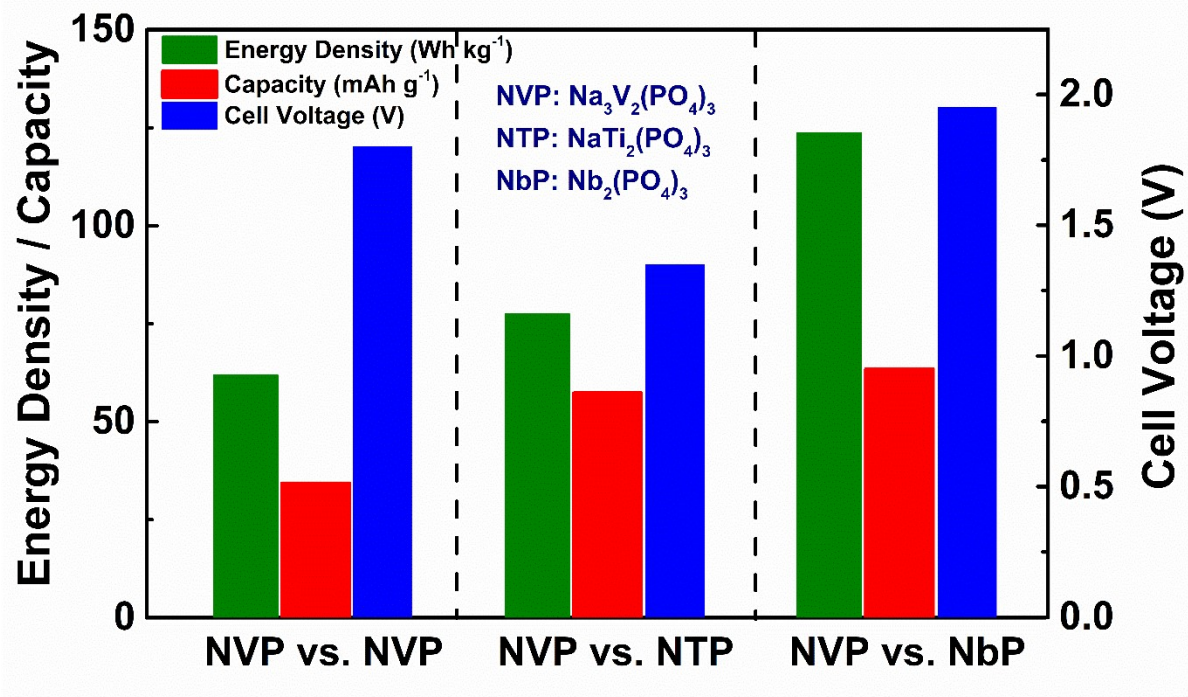

**Figure S6.** A comparison of energy densities of Na-ion cells comprising Na<sub>3</sub>V<sub>2</sub>(PO<sub>4</sub>)<sub>3</sub> as the cathode and Na<sub>3</sub>V<sub>2</sub>(PO<sub>4</sub>)<sub>3</sub> or NaTi<sub>2</sub>(PO<sub>4</sub>)<sub>3</sub> or Nb<sub>2</sub>(PO<sub>4</sub>)<sub>3</sub> as the anode.

The energy densities of Na-ion cells comprising Na<sub>3</sub>V<sub>2</sub>(PO<sub>4</sub>)<sub>3</sub> as the cathode and Na<sub>3</sub>V<sub>2</sub>(PO<sub>4</sub>)<sub>3</sub> or NaTi<sub>2</sub>(PO<sub>4</sub>)<sub>3</sub> or Nb<sub>2</sub>(PO<sub>4</sub>)<sub>3</sub> as the anode are calculated using the following formula:

$$\text{Energy density (Wh kg}^{-1}_{(\text{anode+cathode})}) = \text{average cell voltage} \times \text{capacity (mAh g}^{-1}_{(\text{anode+cathode})})$$

Capacity (mAh g<sup>-1</sup><sub>(anode+cathode)</sub>) is calculated using the following formula:

$$\frac{1}{C_{\text{anode} + \text{cathode}}} = \frac{1}{C_{\text{anode}}} + \frac{1}{C_{\text{cathode}}}$$

The insertion potentials and capacities of NASICON compounds (at C/10 rate) are taken from the references.<sup>1,2</sup>

**Table S1.** Crystallographic parameters and atomic coordinates of NASICON-Nb<sub>2</sub>(PO<sub>4</sub>)<sub>3</sub>

| Nb <sub>2</sub> (PO <sub>4</sub> ) <sub>3</sub>                                 |              |           |            |            |                         |      |
|---------------------------------------------------------------------------------|--------------|-----------|------------|------------|-------------------------|------|
| S.G.: $R\bar{3}c$ ; $Z = 6$                                                     |              |           |            |            | Chi <sup>2</sup> =4.56; |      |
| R <sub>bragg</sub> = 2.33%; R <sub>p</sub> = 8.23%; R <sub>wp</sub> = 11.3%     |              |           |            |            |                         |      |
| $a = 8.6629(1)$ Å; $c = 22.0627(6)$ Å.                                          |              |           |            |            |                         |      |
| V = 1433.92(5) Å <sup>3</sup> ;                                                 |              |           |            |            |                         |      |
| Average Nb-O Bond distance: (Nb-O1) × 3 = 1.975(3) Å; (Nb-O2) × 3 = 1.9368(2) Å |              |           |            |            |                         |      |
| Atom                                                                            | Wyckoff site | X         | Y          | Z          | B (Å <sup>2</sup> )     | Occ. |
| Nb1                                                                             | 12c          | 0         | 0          | 0.14122(2) | 0.0049(2)               | 0.5  |
| Nb2                                                                             | 12c          | 0         | 0          | 0.14122(2) | 0.0049(2)               | 0.5  |
| P                                                                               | 18e          | 0.283(2)  | 0          | 0.25       | 0.0145(1)               | 1.0  |
| O1                                                                              | 36f          | 0.1684(2) | -0.0278(3) | 0.1941(9)  | 0.0127(7)               | 1.0  |
| O2                                                                              | 36f          | 0.1978(2) | 0.1674(2)  | 0.0916(8)  | 0.0063(2)               | 1.0  |

**Table S2.** Refined parameters for the first shell of Nb K-edge EXAFS spectra collected on the pristine, discharged and charge Nb<sub>2</sub>(PO<sub>4</sub>)<sub>3</sub> anodes.

| Sample            | Coordination number | d(Nb-O) Å                          | E <sub>0</sub> (eV) | σ <sup>2</sup> Å <sup>2</sup> | R-factor |
|-------------------|---------------------|------------------------------------|---------------------|-------------------------------|----------|
| Pristine          | 3 + 3               | 2.095(2) x 3<br>1.961(2) x 3       | 3.00                | 0.0001                        | 0.0146   |
| Discharge<br>1.0V | 3.98 + 2.02         | 2.044(5) x 3.98<br>2.169(8) x 2.02 | 5.65                | 0.001(9)                      | 0.0085   |
| Charge 3.0V       | 3.3 + 2.7           | 2.104(5) x 2.7                     | 3.57                | 0.0008                        | 0.0193   |

|  |  |                |  |  |  |
|--|--|----------------|--|--|--|
|  |  | 1.962(8) x 3.3 |  |  |  |
|--|--|----------------|--|--|--|

## References

- 1 M. K. Sadan, A. K. Haridas, H. Kim, C. Kim, G. B. Cho, K. K. Cho, J. H. Ahn and H. J. Ahn, *Nanoscale Adv.*, 2020, **2**, 5166–5170.
- 2 M. Wu, W. Ni, J. Hu and J. Ma, *Nano-Micro Lett.*, 2019, **11**, 1–36.
